# Supplementary material for: A thin film nanocomposite membrane with pre-immobilized UiO-66-NH2 toward enhanced nanofiltration performance
Source: PubMed Central journal article supplement — RSC Adv. 2019 Aug 9;9(43):24802–10. doi: 10.1039/c9ra04714j (PMC9069876; doi:10.1039/c9ra04714j), 2019-08-09
Supplement: RA-009-C9RA04714J-s001.pdf [file RA-009-C9RA04714J-s001.pdf]

## Electronic Supplementary Information (ESI)

### **Thin film nanocomposite membrane with pre-immobilized UiO-66-NH<sub>2</sub> toward enhanced nanofiltration performance**

**Xu Zhang,<sup>§a</sup> Yufan Zhang,<sup>§b</sup> Tiecheng Wang,<sup>a</sup> Zheng Fan,<sup>a</sup> Guoliang Zhang\*,<sup>a</sup>**

<sup>a</sup> *Institute of Oceanic and Environmental Chemical Engineering, State Key Lab Breeding Base of  
Green Chemical Synthesis Technology, Zhejiang University of Technology, Chaowang Road 18#,  
Hangzhou, Zhejiang 310014, China*

*Tel/Fax: 86-571-88320863*

<sup>b</sup> *Department of Mechanical Engineering, College of Engineering, Carnegie Mellon University,  
Pittsburgh, PA 15213, USA*

*\*Corresponding author E-mail: [guoliangz@zjut.edu.cn](mailto:guoliangz@zjut.edu.cn)*

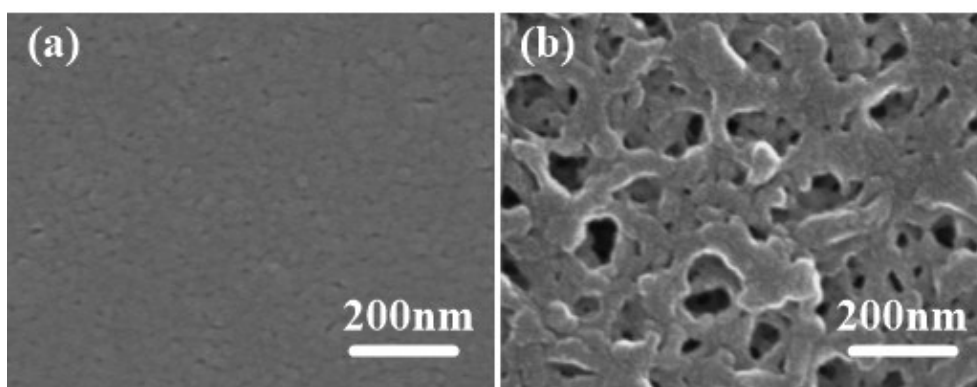

**Fig. S1.** SEM images of PSF and PSF@PDA.

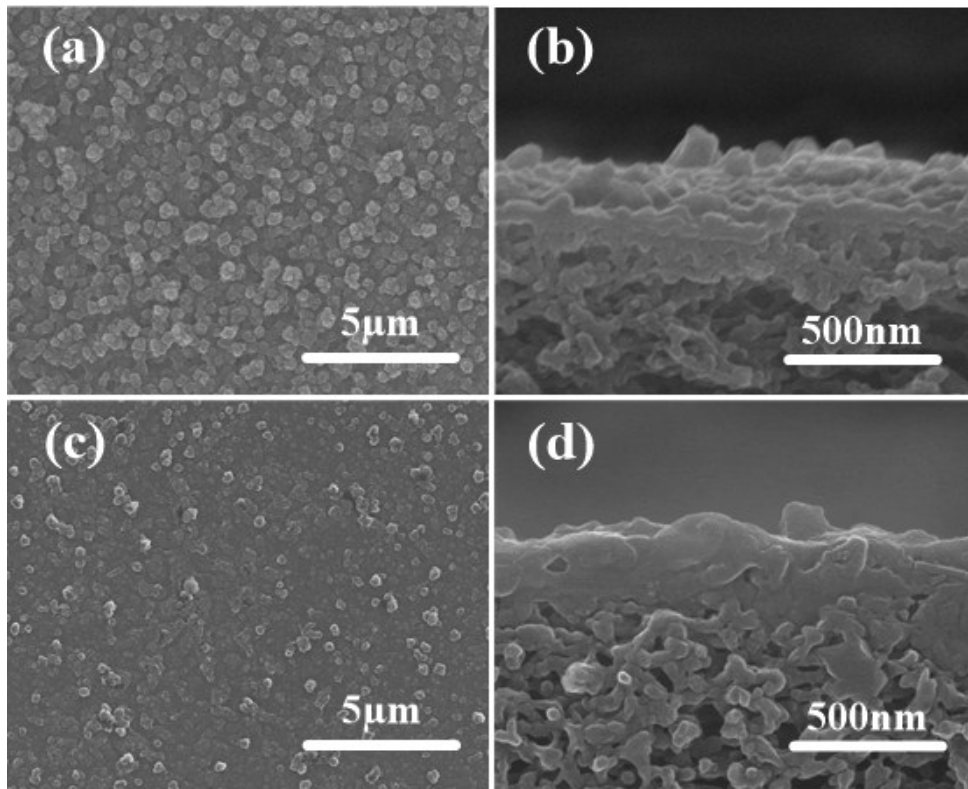

**Fig. S2.** The surface and cross-sectional SEM images of TFC membrane (a, b) and PA membrane with PDA@PSF as substrate (c, d).

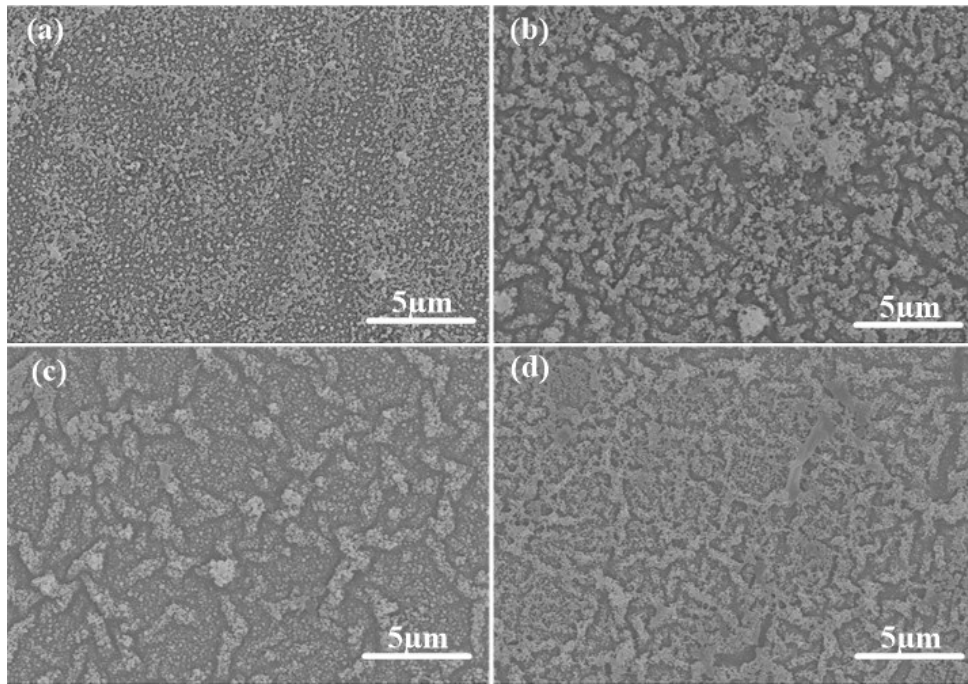

**Fig. S3.** SEM images of the membrane surface: TFN-3h (a), TFN-6h (b), TFN-12h (c), and TFN-24h (d).

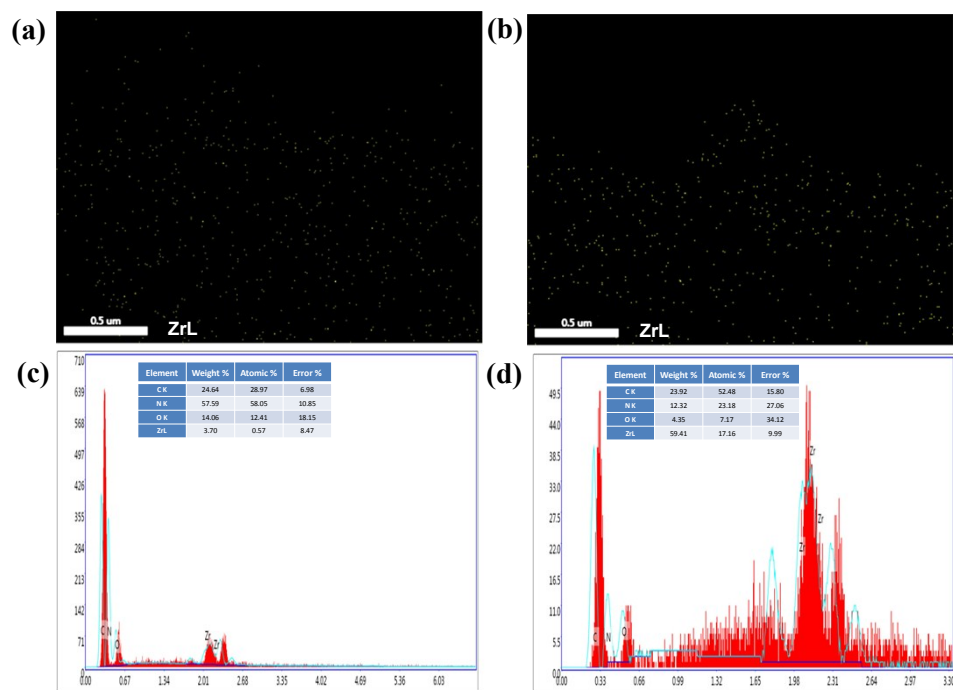

**Fig. S4.** EDX images of TFN/Uio-66-NH<sub>2</sub> membrane (a, c) and PA/Uio-66-NH<sub>2</sub> membrane (b, d).

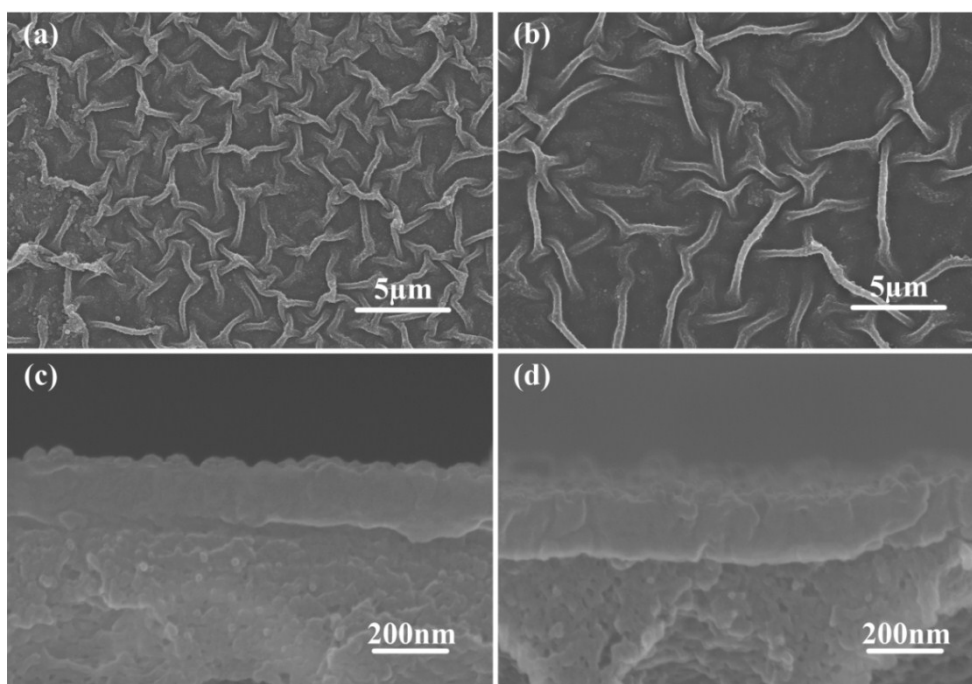

**Fig. S5.** The surface (a) and (b), and cross-sectional (c) and (d) SEM images of TFN/Uio-66-NH<sub>2</sub> (PES) and TFN/Uio-66-NH<sub>2</sub> (PAN).

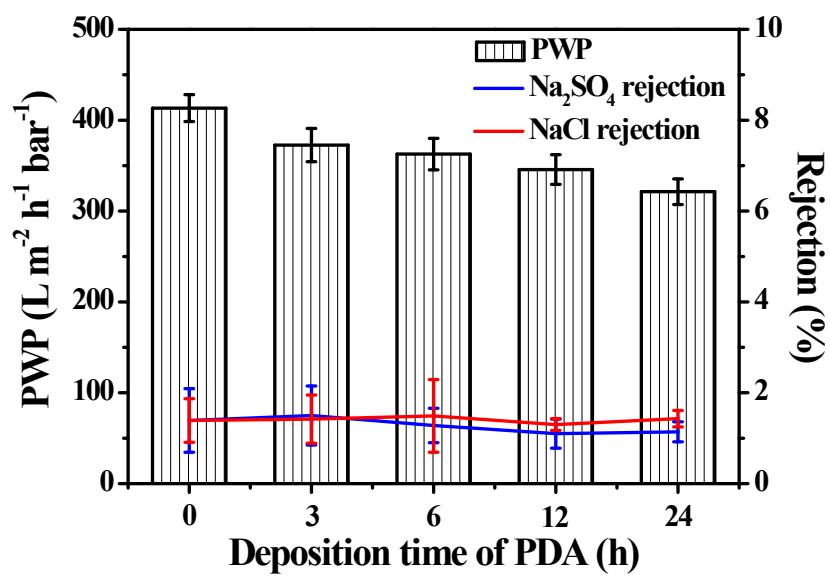

**Fig. S6.** PWP and salt rejection of pure PSF substrate and PDA-coated PSF membrane.

**Table S1** Comparisons of TFN/UiO-66-NH<sub>2</sub> membrane with other MOF-based NF membranes from literatures

| Membrane                               | Required amount of nanofillers | Test condition | Salt                            | Permeability (L m <sup>-2</sup> h <sup>-1</sup> bar <sup>-1</sup> ) | Rejection (%) | Ref       |
|----------------------------------------|--------------------------------|----------------|---------------------------------|---------------------------------------------------------------------|---------------|-----------|
| TFN-ZIF-8                              | 0.5 w/v%                       | 1 g/L, 6 bar   | Na <sub>2</sub> SO <sub>4</sub> | 9.17                                                                | 95            | 9         |
| TFN-mZIF-2                             | 0.1 w/v%                       | 1 g/L, 4 bar   | Na <sub>2</sub> SO <sub>4</sub> | 14.90                                                               | 93            | 16        |
| PA/UiO-66                              | 0.15 w/v%                      | 1g/L, 10 bar   | Na <sub>2</sub> SO <sub>4</sub> | 11.5                                                                | 92            | 26        |
|                                        |                                |                | MgSO <sub>4</sub>               |                                                                     | 93            |           |
|                                        |                                |                | MgCl <sub>2</sub>               |                                                                     | 90            |           |
| PSF/ZIF-8/PA                           | Large                          | 1g/L,          | MgSO <sub>4</sub>               | 4                                                                   | 91            | 38        |
| TFN-GO/ZIF-8                           | 0.2 w/v%                       | 1g/L, 4 bar    | Na <sub>2</sub> SO <sub>4</sub> | 4.06                                                                | ~100          | 39        |
|                                        |                                |                | MgSO <sub>4</sub>               |                                                                     | 77            |           |
|                                        |                                |                | MgCl <sub>2</sub>               |                                                                     | 10.5          |           |
| PA/ZIF-8 (LBL)                         | Large                          | 1g/L, 10 bar   | MgSO <sub>4</sub>               | 2.71                                                                | 45            | 40        |
| UiO-66                                 | Pure MOF membrane              | 2 g/L, 10 bar  | MgCl <sub>2</sub>               | 0.14                                                                | 98            | 22        |
| NH <sub>2</sub> -MIL-101(Al) /Chitosan | 15 w/v%                        | 2g/L,          | MgCl <sub>2</sub>               | 4.0                                                                 | 93            | 41        |
|                                        |                                |                | Na <sub>2</sub> SO <sub>4</sub> |                                                                     | 10            |           |
| TFN/hollow ZIF-8                       | 0.04 w/v%                      | 1 g/L, 6 bar   | Na <sub>2</sub> SO <sub>4</sub> | 19.4                                                                | 95.2          | 42        |
| TFN/UiO-66                             | 0.01 w/v%                      | 1 g/L, 6 bar   | Na <sub>2</sub> SO <sub>4</sub> | 13.0                                                                | 98.1          | This work |
|                                        |                                |                | MgSO <sub>4</sub>               |                                                                     | 94.8          |           |
|                                        |                                |                | MgCl <sub>2</sub>               |                                                                     | 76.8          |           |
